# Supplementary material
Source: PubMed Central journal article supplement (PMC10484303)
Supplement: jgv-104-1892-s001.pdf [file jgv-104-1892-s001.pdf]

## Supplemental Figure 1

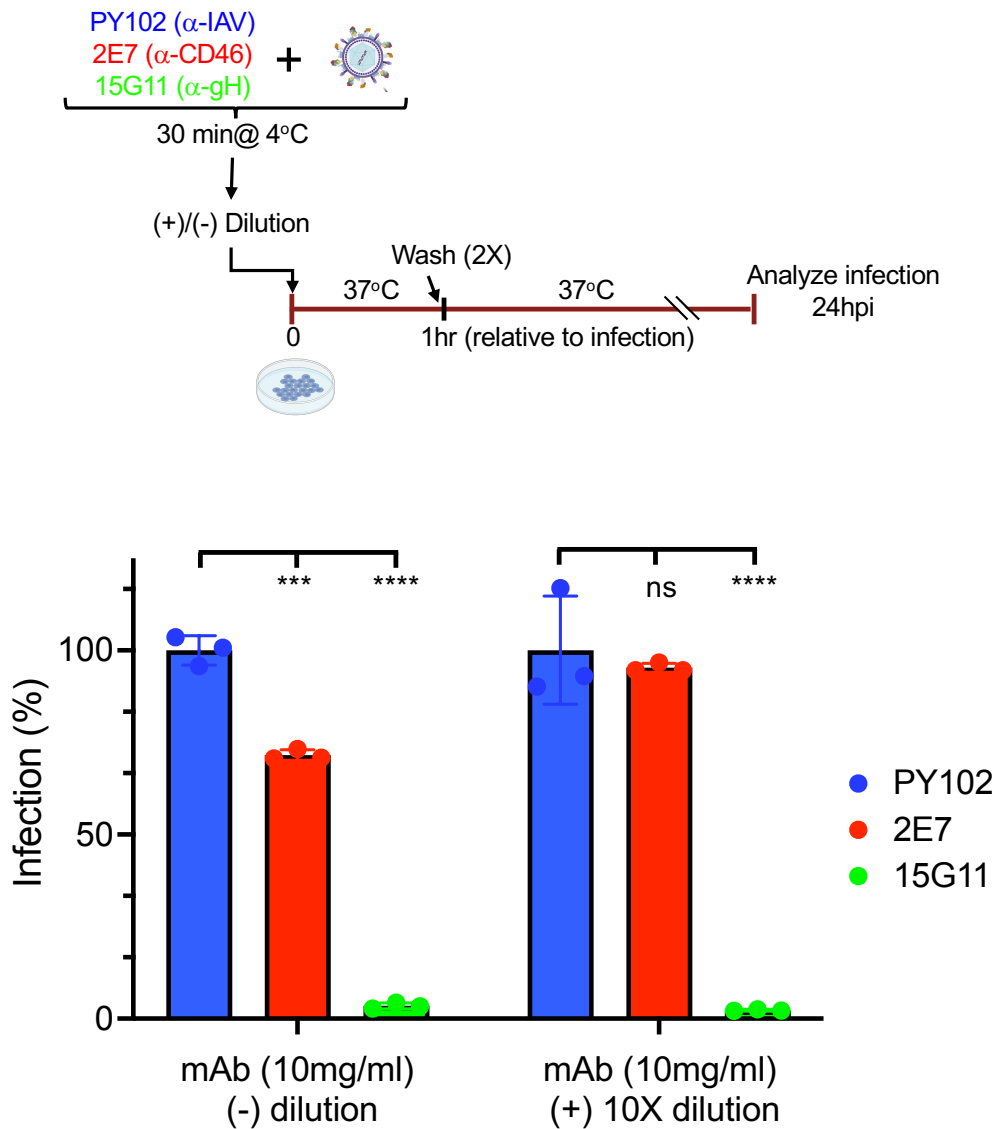

**Supplemental Figure 1. Evaluate mab preincubation conditions.** HCMV AD169R (MOI:0.2) pre-incubated with PY102, 2E7, or 15G11 (10mg/ml) for 30 min at 4°C was directed incubated with ARPE-19 cells or diluted 10X with media followed addition to ARPE-19 cells and analyzed using an infectivity assay. Percent infection was determined using the corresponding PY102 samples as 100% infection. s.d. is depicted in the experiment. \*\*\* $p < 0.001$ , \*\*\*\* $p < 0.0001$  (2-way ANOVA, Dunnett's multiple comparison test).

## Supplemental Figure 2

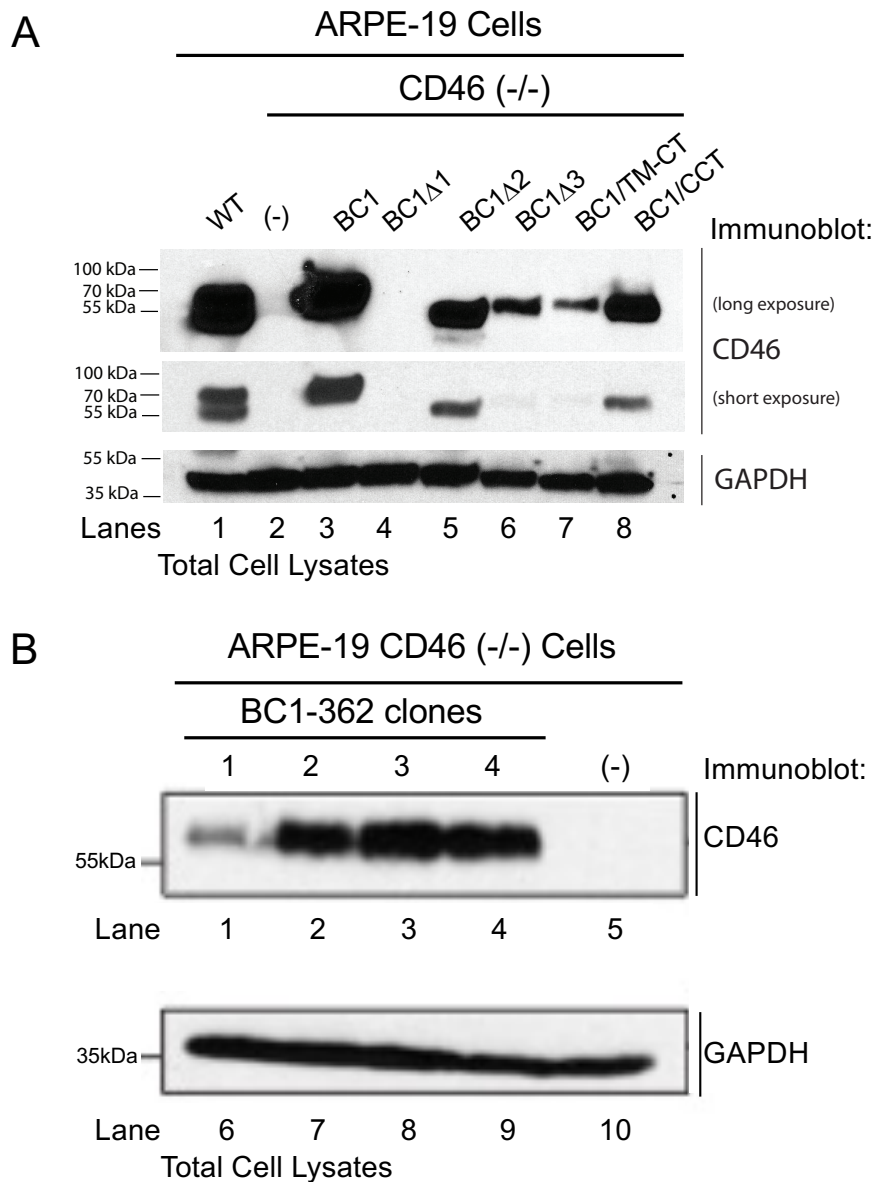

**Supplemental Figure 2.** Analysis of CD46 mutant expression in ARPE-19 CD46 (-/-) cells. The cell lysates from **(A)** ARPE-19 and ARPE-19 CD46<sup>-/-</sup> KO cells expressing vector only (-) or CD46-BC1,, CD46-BC1 $\Delta$ 1, CD46-BC1 $\Delta$ 2, CD46-BC1 $\Delta$ 3, CD46-BC/TM-CT, CD46-BC1/CCT, and **(B)** BC1-362 clones (1-4) were subjected to anti-CD46 and anti-GAPDH immunoblots, respectively.
